# Supplementary material for: Neurological and Neuroimaging Features of CYB5R3-Related Recessive Hereditary Methemoglobinemia Type II
Source: MDPI journal article supplement (doi:10.3390/brainsci12020182), 2022-01-29
Supplement: s1 [file s1]

**Table S1:** Main features in patients with *CYB5R3*-related congenital methemoglobinemia type II selected from available literature data.

\*In reference to symptoms and signs, original nomenclature used in the reference article has been left.

List of abbreviations: BG basal ganglia, CC corpus callosum, CI cognitive impairment, CSF cerebrospinal fluid, CT computed tomography, CP cerebral palsy, DD developmental delay, DRE drug-resistant epilepsy, MR mental retardation, Mic Microcephaly, MD movement disorders, NR not reported, OFC occipito-frontal circumference, PMD psychomotor delay, WM white matter.

| Patient (original description) | Ethnicity | Age at onset | Symptoms at onset*                      | Other symptoms during disease's course                                                    | MetHB level % | Neuroimaging          | EEG                | CYB5R3 variants<br>NM_000398.7<br>NP_000389.1 | Therapy and outcome (age, status, follow up MRI, MetHb)                                         | Reference                                                                                             |
|--------------------------------|-----------|--------------|-----------------------------------------|-------------------------------------------------------------------------------------------|---------------|-----------------------|--------------------|-----------------------------------------------|-------------------------------------------------------------------------------------------------|-------------------------------------------------------------------------------------------------------|
| Case 4                         | Cuban     | Birth        | Cyanosis                                | PMD, severe speech delay                                                                  | 19.7          | NR                    | Slowly generalized | NR                                            | Improvement of speech delay after 15 years                                                      | Gonzalez et al., 1978                                                                                 |
| Case 5                         | Cuban     | Birth        | Cyanosis                                | PMD with severe speech delay                                                              | 15            | NR                    | NR                 | NR                                            | NR                                                                                              | Gonzalez et al., 1978                                                                                 |
| III 5                          | Japanese  | NR           | Cyanosis, MR                            | NR                                                                                        | 10.7          | NR                    | NR                 | c.382T>C<br>p.Ser128Pro                       | 24 years                                                                                        | Kobaiashi et al., 1990                                                                                |
| III 2                          |           | NR           | Cyanosis , MR                           | NR                                                                                        | 23.6          | NR                    | NR                 |                                               | NR                                                                                              |                                                                                                       |
| III 4                          |           | NR           | Cyanosis, MR                            | NR                                                                                        | 18.6          | NR                    | NR                 |                                               | NR                                                                                              |                                                                                                       |
| ----                           | Japanese  | Birth        | Cyanosis (isolated)                     | PMD, joint malformations, short stature                                                   | 15.4          | Cortical atrophy (CT) | Borderline         | NR                                            | 43 years, clumsy gait and mental retardation                                                    | Yawata et al., 1992                                                                                   |
| ----                           | Japanese  | Birth        | Cyanosis (isolated)                     | PMD with poor head control (6mo), choreo-athetosis, cerebellar involvement, increased OTR | 24            | Normal (CT)           | Normal             | c.895-897del<br>p.Phe299del                   | 13 years no worsening of movement disorders, bizarre gait, speech disturbance, slight scoliosis | Shirabe et al., 1994<br><br>(previously described in Nishina et al., 1970 and Takeshita et al., 1982) |
| BEN                            | Algerian  | NR           | Profound MR<br>Mic, bilateral athetosis | NR                                                                                        | NR            | NR                    | NR                 | c.463+8G>C                                    | NR                                                                                              | Mota Viera et al., 1995<br><br>(previously described in Kaplan et al., 1979)                          |
| BOU                            | Algerian  | NR           | Profound MR,<br>Mic,bilateral athetosis | NR                                                                                        | NR            | NR                    | NR                 | c.655C>T<br>p.Arg219*                         | NR                                                                                              | Mota Viera et al., 1995<br><br>(previously described in                                               |

|           |                     |                    |                                         |                                                                                                                                        |      |                                                                                                      |                                                                                                                           |                                                    |                                                                                                                            |                         |
|-----------|---------------------|--------------------|-----------------------------------------|----------------------------------------------------------------------------------------------------------------------------------------|------|------------------------------------------------------------------------------------------------------|---------------------------------------------------------------------------------------------------------------------------|----------------------------------------------------|----------------------------------------------------------------------------------------------------------------------------|-------------------------|
|           |                     |                    |                                         |                                                                                                                                        |      |                                                                                                      |                                                                                                                           |                                                    |                                                                                                                            | Lostanlen et al., 1981) |
| ----      | Italian             | Birth              | Cyanosis                                | First months: feeding difficulties, failure to thrive, PMD<br>1 year: severe spastic-dystonic quadriparesis, hyperkinetic MD, Mic, DRE | NR   | Diffuse brain atrophy (CT)                                                                           | Slow and irregular basal activity with extremely frequent and periodic paroxysmal burst spike-wave complexes during sleep | c.458-1G>T                                         | No response to Vitamin C, vegetative status at 9 years                                                                     | Shirabe et al., 1995    |
| ---       | United Kingdom      | Early infancy      | Cyanosis , DD                           | NR                                                                                                                                     | 11.3 | NR                                                                                                   | NR                                                                                                                        | c.129>A<br>p.Tyr43*<br><br>c. 287C>A<br>p.Pro96His | 6 years<br>squint, mild tremor, and some degree of hypertonia                                                              | Manabe et al., 1996     |
| ---       | South Africa        | NR                 | Cyanosis, dystonic-athetoid CP, MR, Mic | NR                                                                                                                                     | 60   | NR                                                                                                   | NR                                                                                                                        | c.464-2A>C                                         | NR                                                                                                                         | Owen et al., 1997       |
| Patient 1 | Thai                | NR                 | NR                                      | NR                                                                                                                                     | NR   | NR                                                                                                   | NR                                                                                                                        | c.250C>T<br>p.Arg84*                               | Absent speech, no sit position, spasticity                                                                                 | Higasa et al., 1998     |
| ---       | Hindoostani Surinam | Birth              | SGA, cyanosis                           | Severe PMD, Mic, athetoid movements, generalized hypertonia, DRE, dysphagia                                                            | 40   | frontal and bitemporal cortical atrophy, cerebellar atrophy, retarded myelination, and BG hypoplasia | NR                                                                                                                        | c.229C>T<br>p.Gln77*<br>+<br>c.478C>T<br>p.Arg160* | Died suddenly at 8 years, probably due to aspiration                                                                       | Aalfs et al., 2000      |
| Case 3    | German              | Birth              | Cyanosis                                | Severe PMD                                                                                                                             | 15   | Slightly reduced myelination and CC atrophy                                                          | NR                                                                                                                        | c.334-2A>G<br>+<br>c.379A>G<br>p.Met127Val         | 4 years started walking at three years                                                                                     | Kugler et al., 2001     |
| Case 1    | Pakistan            | Birth (normal OFC) | Cyanosis                                | 4 months: DD, spasticity, Mic                                                                                                          | 17   | 4 months: enlargement of CSF spaces and delayed myelination                                          | NR                                                                                                                        | NR                                                 | 4 years: Mic, short stature, strabismus, failure to thrive, profound CI, no language, spastic tetraparesis (unable to sit) | Toelle et al., 2004     |
| Case 2    | Turkish             | Birth (normal OFC) | Cyanosis                                | 4 months: DD                                                                                                                           | 35   | 5 and 16 months: enlargement of CSF spaces and delayed myelination, thin CC                          | NR                                                                                                                        | c.721A>G<br>p.Arg241Gly                            | 2.5 spastic tetraparesis (unable to sit), profound CI, strabismus, Mic                                                     | Toelle et al., 2004     |
| ----      | NR                  | Birth              | Cyanosis                                | DD, Mic                                                                                                                                | 16.3 | NR                                                                                                   | NR                                                                                                                        | c.463+2T>C                                         | 5 years<br>No head control                                                                                                 | Yilmaz et al., 2005     |

|                                                        |                    |          |                                                                                      |                                                                                                                |      |                                                                                               |                                             |                                                              |                                                                                                                                                                |                                                                                |
|--------------------------------------------------------|--------------------|----------|--------------------------------------------------------------------------------------|----------------------------------------------------------------------------------------------------------------|------|-----------------------------------------------------------------------------------------------|---------------------------------------------|--------------------------------------------------------------|----------------------------------------------------------------------------------------------------------------------------------------------------------------|--------------------------------------------------------------------------------|
| ----                                                   | NR                 | 3 months | Cyanosis and agitation                                                               | 1.5 years: DD, hypotonia, no head control<br><br>4 years: atonic convulsion episodes                           | 51   | 10 years MRI normal                                                                           | Disorganization                             | NR                                                           | 10 years Mic, strabismus, severe CI, tetraparesis, no language, can sit with help, dysphagia (improvement of dysphagia and social contact after ascorbic acid) | Gokalp et al., 2005                                                            |
| Case 1<br><br>(patient LAM in Mota Viera et al., 1995) | French and Spanish | 14 days  | Cyanosis, vomiting, Mic, Dystonia, distal upper limb pronation, motor uncoordination | PMD, dystonia, athetosis, strabismus                                                                           | 15   | (CT) cortico-subcortical atrophy with prominent involvement of the frontal and temporal lobes | diffuse slowing with no epileptic features  | c.610T>C<br>p.Cys204Arg<br>+<br>c. 815-817del<br>p.Met273del | Early death (age not specified)                                                                                                                                | Ewenckyz et al., 2008<br><br>(previously described in Mota Viera et al., 1995) |
| Case 2                                                 | French             | 2 days   | Cyanosis                                                                             | Global hypertonia with flexion spasms, athetosis (10mo). Mic (11mo), strabismus                                | 32   | NR                                                                                            | normal                                      | c.392T>C<br>p.Leu131Pro<br>+<br>c.226G>A<br>p.Gly76Ser       | Living in a specialized institute for severely disabled persons. Speech a gross motor function delay.                                                          | Ewenckyz et al., 2008                                                          |
| Case 3                                                 | Lebanese           | 4 month  | Mic (at birth - 2DS) axial hypotonia with limb hypertonia                            | Hypotrophic, cyanosis, dystonia, athetosis, strabismus pyramidal signs, gross motor delay                      | 28,4 | cortical atrophy                                                                              | normal                                      | c.882-884delinsAA<br>p.Thr295fs*                             | Death at age 10,5 years of pneumonia.                                                                                                                          | Ewenckyz et al., 2008<br><br>(previously described in Leroux et al., 2005)     |
| Case 4                                                 | Tunisian           | Birth    | Mic                                                                                  | Global hypotonia, profound CI, strabismus, generalized dystonia, athetosis.                                    | 17,5 | cerebral atrophy. Normal spectroscopy                                                         | diffuse slowing with no epileptic features. | c.463+8G>C                                                   | 10 years hypotrophic, with MD, improvement in reactivity to environmental stimuli. Speech impairment                                                           | Ewenckyz et al., 2008                                                          |
| Case 5                                                 | French             | 1 month  | Generalized hypotonia, dystonia, failure to thrive, strabismus vomiting              | Mic, axial hypotonia, general dystonia, diffuse choreo-athetosis (2y). Speech delay. West syndrome, strabismus | 23,7 | cranial dysmorphism, global cerebral atrophy and delayed myelination. Spectro-MRI was normal. | hypsarrhythmia                              | c.332A>T<br>p.Lys111Met                                      | At age 3.5 years, mic had worsened. Improvement in choreo-athetoid movements, but increased in dystonic postures.                                              | Ewenckyz et al., 2008                                                          |

|        |          |          |                                                                                   |                                                                                                                                                                              |      |                                                                                                                                                         |                                                                                |                             |                                                                                                                                                                                                                  |                       |
|--------|----------|----------|-----------------------------------------------------------------------------------|------------------------------------------------------------------------------------------------------------------------------------------------------------------------------|------|---------------------------------------------------------------------------------------------------------------------------------------------------------|--------------------------------------------------------------------------------|-----------------------------|------------------------------------------------------------------------------------------------------------------------------------------------------------------------------------------------------------------|-----------------------|
| Case 6 | French   | Birth    | Cyanosis                                                                          | Mic (5 months), axial hypotonia, peripheral hypertonia with athetoid arm movements, strabismus (6 months). He could not sit, but made sounds, smiled and reacted to his name | 23   | NR                                                                                                                                                      | NR                                                                             | c.153+1G>A                  | 18 months. Progressive mic, PMD with partial improvement in swallowing ability                                                                                                                                   | Ewenckyz et al., 2008 |
| Case 1 | Egyptian | 5 months | Cyanosis, DD, profound CI, mic, bilateral athetosis, strabismus, Vomiting, crying | NR                                                                                                                                                                           | 12,1 | NR                                                                                                                                                      | NR                                                                             | c.153+2T>C                  | 5 m: ascorbic acid therapy                                                                                                                                                                                       | Fermo et al., 2008    |
| ---    | Honduran | Birth    | Cyanosis                                                                          | 1 months: hypertonia than hypotonia. Infancy: Severe growth retardation and global neurologic impairments strabismus, limbs dystonia and choreo-athetosis                    | 21,3 | diffuse atrophy and decreased WM                                                                                                                        | NR                                                                             | c.215delG p.Gly72Alafs*100. | Last FU 8 years. 500 mg of oral ascorbic acid per day. After 9m mild-to-moderate improvements in multiple parameters, especially in muscle strength and coordination related to sitting, chewing, and swallowing | Hudspeth et al., 2009 |
| Case 1 | Turkish  | Birth    | Cyanosis                                                                          | 2y: severe DD (inability to lag head, sit, and crawl, grasp objects or talk), mic, frequent vomiting                                                                         | 28   | cerebral atrophy, retarded myelinization, and thin CC                                                                                                   | NR                                                                             | NR                          | 2y: ascorbic acid (500 mg daily) was started.                                                                                                                                                                    | Yuksel et al., 2009   |
| Case 2 |          | Birth    | Cyanosis                                                                          | 1y: severe DD, growth retardation. mic, strabismus, generalized hypertonia.                                                                                                  | 26   | cerebral atrophy, retarded myelinization, thin CC                                                                                                       | NR                                                                             | NR                          | 1y: ascorbic acid (500 mg daily) was started.                                                                                                                                                                    |                       |
| ----   | Algerian | Birth    | Hypotonia, mic, small for gestational age                                         | 6m: severe hypotonia, strabismus, profound cognitive impairment, areflexia, generalized dystonia with choreoathetoid arm                                                     | 22   | At 1 year normal. At 4 year diffuse cortical-subcortical atrophy with prominent involvement of the frontal lobes as well as delay of myelination in the | 6 month: diffuse slowing of the background activity with no epileptic features | c.463+8G>C                  | 5 years<br><br>Ascorbic acid (100 mg/kg/day) was started with no improvement in motor or mental performance, but resolution in the epileptic-                                                                    | Fusco et al., 2011    |

|           |            |       |                                           |                                                                                                                                                                                                                                                                                               |         |                                                      |    |                                                       |                                                                                                                                            |                    |
|-----------|------------|-------|-------------------------------------------|-----------------------------------------------------------------------------------------------------------------------------------------------------------------------------------------------------------------------------------------------------------------------------------------------|---------|------------------------------------------------------|----|-------------------------------------------------------|--------------------------------------------------------------------------------------------------------------------------------------------|--------------------|
|           |            |       |                                           | movements.<br><br>5 years of age: severe hypotonia (he could not control his head or sit up), progressive severe mic (-7 SD), strabismus, global dystonia with severe limb choreo-athetosis, facial grimacing, growth retardation, cyanosis, paroxysmal episodes resembling epileptic spasms. |         | hemispheric white matter. Global cerebellar atrophy. |    |                                                       | type spasms.                                                                                                                               |                    |
| Case II-4 |            | Birth | Cyanosis                                  | NR                                                                                                                                                                                                                                                                                            | 51.4    | NR                                                   | NR |                                                       | 6 years: DD, severe tetraspastic CP, profound CI, secondary mic, generalized dystonia                                                      |                    |
| Case II-1 | Indian     | Birth | Cyanosis                                  | NR                                                                                                                                                                                                                                                                                            | 12.68   | NR                                                   | NR | c.611G>A<br>p.Cys204Tyr<br>+<br>c.708G>A<br>p.Trp236* | 13 years: DD, severe tetraspastic CP, profound CI, secondary mic, generalized dystonia                                                     | Kedar et al., 2011 |
| Case II-3 |            | Birth | Cyanosis                                  | NR                                                                                                                                                                                                                                                                                            | 41.76   | NR                                                   | NR |                                                       | 8 years: DD, severe tetraspastic CP, profound CI, secondary mic, generalized dystonia                                                      |                    |
| Case 1    | Australian | Birth | Periodic dusky episodes and skin mottling | 12 weeks: poor feeding<br>4 months: failure to thrive, mild central hypotonia with head lag, axial hypotonia.<br><br>At 12 weeks ascorbic acid 250mg daily was started                                                                                                                        | 17,5    | 16 months: normal for age                            | NR | c.173G>C<br>p.Arg58Pro<br>+<br>c.226G>A<br>p.Gly76Ser | Last FU: 20 months of age. He can sit independently and have a pincer grip. He babbles, but has no words. Thoracic scoliosis with dystonia | Percy et al., 2012 |
| Case 2    | NR         | Birth | Cyanosis                                  | NR                                                                                                                                                                                                                                                                                            | 10,4-30 | NR                                                   | NR | c.173G>C<br>p.Arg58Pro<br>+                           | 2 years 5 months: PMD                                                                                                                      | Percy et al., 2012 |

|         |          |        |                                                          |                                                                                                                                              |      |                                                                                                                |                                                                                                          |                                                                            |                                                                                                                                               |                         |
|---------|----------|--------|----------------------------------------------------------|----------------------------------------------------------------------------------------------------------------------------------------------|------|----------------------------------------------------------------------------------------------------------------|----------------------------------------------------------------------------------------------------------|----------------------------------------------------------------------------|-----------------------------------------------------------------------------------------------------------------------------------------------|-------------------------|
|         |          |        |                                                          |                                                                                                                                              |      |                                                                                                                |                                                                                                          | c.562_564del<br>p.Leu188del                                                |                                                                                                                                               |                         |
| Case 19 | Indian   | NR     | NR                                                       | severe DD, mic,<br>strabismus,<br>spasticity,<br>dystonia                                                                                    | 12   | generalized<br>brain atrophy,<br>atrophy of the<br>cerebellum, mild<br>hypomyelination.                        | NR                                                                                                       | c.226G>A<br>p.Gly76Ser                                                     | 3 y<br>methylene blue<br>(0.5 mg/kg body<br>weight)                                                                                           | Warang et al.,<br>2015a |
| Case 20 | Indian   | NR     | NR                                                       | severe DD, mic,<br>strabismus,<br>spasticity,<br>dystonia                                                                                    | 72   | generalized<br>brain atrophy,<br>atrophy of the<br>cerebellum, mild<br>hypomyelination                         | NR                                                                                                       | c.226G>A<br>p.Gly76Ser                                                     | 2 years and a half.<br>methylene blue (0.5<br>mg/kg body weight)                                                                              | Warang et al.,<br>2015a |
| Case 21 | Indian   | NR     | NR                                                       | severe DD, mic,<br>strabismus,<br>spasticity,<br>dystonia                                                                                    | 15,2 | generalized<br>brain atrophy,<br>atrophy of the<br>cerebellum, mild<br>hypomyelination                         | NR                                                                                                       | c.708G>A<br>p.Trp236*                                                      | 3 years and a half.<br>methylene blue (0.5<br>mg/kg body weight)                                                                              | Warang et al.,<br>2015a |
| Case 22 | Indian   | NR     | NR                                                       | severe DD, mic,<br>strabismus,<br>spasticity,<br>dystonia                                                                                    | 52   | generalized<br>brain atrophy,<br>atrophy of the<br>cerebellum, mild<br>hypomyelination                         | NR                                                                                                       | NR                                                                         | 3 years.<br>methylene blue (0.5<br>mg/kg body weight)                                                                                         | Warang et al.,<br>2015a |
| Case 23 | Indian   | NR     | NR                                                       | severe DD, mic,<br>strabismus,<br>spasticity,<br>dystonia                                                                                    | 25,5 | generalized<br>brain atrophy,<br>atrophy of the<br>cerebellum, mild<br>hypomyelination                         | NR                                                                                                       | NR                                                                         | 5 years<br>methylene blue (0.5<br>mg/kg body weight)                                                                                          | Warang et al.,<br>2015a |
| ---     | Indian   | 6 m    | Cyanosis,<br>DD, failure to<br>thrive, hypotonia,<br>mic | NR                                                                                                                                           | 61,1 | NR                                                                                                             | NR                                                                                                       | c.517_525del<br><br>p.Lys173_Val175del                                     | 11 months<br><br>Treated<br>with methylene blue<br>(0.5 mg/kg body<br>weight) was started<br>with no improvement<br>in mental<br>performance. | Warang et al.,<br>2015b |
| ---     | NR       | NR     | NR                                                       | 3 year 9 months:<br>growth and speech<br>delay, hypotonic but<br>could pull to stand.                                                        | 14   | NR                                                                                                             | NR                                                                                                       | c.173G>C<br>p.Arg58Pro<br>+<br>c.226G>A<br>p.Gly76Ser.                     | Methylene blue 1<br>mg/kg via<br>gastrostomy,<br>three times per week<br>for 4 months, with<br>mild improvement in<br>behaviors problems      | Cooper et al.,<br>2016  |
| ---     | American | 8 days | Feeding<br>Difficulty,<br>frequent<br>vomiting.          | 2 months: poor<br>weight gain, lack of<br>a social smile,<br>hypotonia<br>3 months: mic,<br>failure to thrive,<br>swallowing<br>disturbances | NR   | Progressive<br>cerebral and<br>cerebellar atrophy,<br>hypomyelination<br><br>(MRI performed at<br>5 months, 13 | 17 months:<br>disorganization,<br>multifocal and<br>generalized<br>spikes and<br>spike-wave<br>complexes | c.478C>T<br>p.Arg160*<br>+<br>heterozygous partial<br>deletion of intron 1 | 28 months: ketogenic<br>diet with partial<br>seizure control<br><br>3years 5months:<br>decreased muscle<br>mass, appendicular                 | Mannino et al.,<br>2017 |

|              |               |                  |                                     |                                                                                                                                                                                                  |      |                                                                                                                   |                                                                                                                                   |                                   |                                                                                                                                                                  |                                                     |
|--------------|---------------|------------------|-------------------------------------|--------------------------------------------------------------------------------------------------------------------------------------------------------------------------------------------------|------|-------------------------------------------------------------------------------------------------------------------|-----------------------------------------------------------------------------------------------------------------------------------|-----------------------------------|------------------------------------------------------------------------------------------------------------------------------------------------------------------|-----------------------------------------------------|
|              |               |                  |                                     | 7 months: hyperkinetic MD, spasticity, dystonia<br>12 months: dysmotility and visceral hyperalgesia<br>17 months: spastic movements, loss of head control<br>34 months: cyanosis                 |      | months, 3 year and half                                                                                           |                                                                                                                                   |                                   | hypertonia, axial hypotonia, myoclonic jerks                                                                                                                     |                                                     |
| Index case 1 | Indian        | Birth-first days | Mic, low weight, cyanosis, vomiting | First months: feeding difficulties, failure to thrive, PMD<br>1 year: spastic-dystonic quadriparesis, hyperkinetic MD, DRE                                                                       | 65   | 1 year: Diffuse brain atrophy (CT)                                                                                | 1 year: slow and irregular basal activity with extremely frequent and periodic paroxysmal burst spike-wave complexes during sleep | c.606_607del<br>p.Thr 202Serfs*98 | 2 years: severe cognitive and motor impairment                                                                                                                   | Gupta et al., 2018<br><br>and<br>Gupta et al., 2020 |
| Index case 2 | Muslim        | Birth            | Mic, low weight, cyanosis           | Infancy: severe growth retardation and PMD                                                                                                                                                       | 34   | Diffuse atrophy and decreased WM                                                                                  | NR                                                                                                                                | c.766_768del<br>p.Glu256del       | 10 years                                                                                                                                                         | Gupta et al., 2018<br><br>Gupta et al., 2020        |
| Index case 3 | Indian-Muslim | 4 months         | Afebrile convulsion                 | 6 months: DRE, PMD, poor growth with OFC 97%,                                                                                                                                                    | 39,4 | Normal (CT)                                                                                                       | Abnormal left temporal spikes                                                                                                     | c.226G>A<br>p.Gly76Ser            | 3 years                                                                                                                                                          | Gupta et al., 2018<br>and<br>Gupta et al., 2020     |
| Case 1       | Arabian       | 3 months         | Hypertonia in the limbs             | 6 months: DRE<br>22m: axial hypotonia with severe head lag, mildly increased appendicular tone with exaggerated OTR<br><br>Coenzyme Q10 and ascorbic acid therapy was started at 22months of age | 16,6 | 10m: mild fronto-temporal atrophy.<br>Hypoplastic BG (caudate and lentiform nuclei)<br><br>MR spectroscopy normal | NR                                                                                                                                | c.274C>T<br>p.Arg92Trp            | 3 years: DRE, severe DD, spastic quadriplegia, axial hypotonia, hyperreflexia, strabismus. Severe oropharyngeal dysphagia with recurrent respiratory infections. | Nicolas-Jilwan, 2019                                |

|        |         |          |                  |                                                                                                                                                                                                                                  |       |                                                                                                                                              |                                                                  |                                                                         |                                                                                                                                     |                    |
|--------|---------|----------|------------------|----------------------------------------------------------------------------------------------------------------------------------------------------------------------------------------------------------------------------------|-------|----------------------------------------------------------------------------------------------------------------------------------------------|------------------------------------------------------------------|-------------------------------------------------------------------------|-------------------------------------------------------------------------------------------------------------------------------------|--------------------|
| Case 2 |         | Birth    | Cyanosis         | 8w: severe axial hypotonia and appendicular hypertonia (dystonia and spasticity), mic, short stature<br><br>8w: ascorbic acid and coenzyme Q-10<br><br>7 months: partially-matched unrelated cord blood transplant which failed. | 18    | 8w: mild frontotemporal atrophy, hypoplastic BG(caudate and lentiform nuclei)<br><br>Normal MR spectroscopy                                  | NR                                                               |                                                                         | 19 months: profound DD, spasticity, mic. G-tube feeding due to severe oropharyngeal dysphagia.                                      |                    |
| 19     | Indian  | NR       | NR               | NR                                                                                                                                                                                                                               | 12,89 | NR                                                                                                                                           | NR                                                               | c.229C>T p.Gln77*                                                       | 10 months                                                                                                                           | Gupta et al., 2020 |
| ----   | Italian | 7 months | Cyanosis and PMD | 1 year: strabismus, tetraparesis                                                                                                                                                                                                 | 20-28 | PCH-like appearance, thin CC, simplified gyral pattern with reduction of frontal gyri and enlargement of sub-arachnoids spaces, WM reduction | Fairly organized background activity with no epileptic anomalies | Homozygous microdeletion of about 31 Kb involving part of <i>CYB5R3</i> | 22 months: strabismus, spastic tetraparesis, microcephaly, improvement of eye contact and vocalization after acid ascorbic therapy. | This paper         |
